# Supplementary material
Source: publisher figshare collection journal article supplement (https://frontiersin.figshare.com/ndownloader/files/31082347)
Supplement: Supplementary file [file 31082347]

## *Supplementary Materials*

### 1 Supplementary Table

Table 1.

*fMRI runs analyzed by participant (pre-registered and exploratory sample)*

| Participant | Task         | fMRI Run                                       | Pre-registered Sample |
|-------------|--------------|------------------------------------------------|-----------------------|
| 5008        | Phonological | sub-5008_ses-5_task-Phon_acq-D1S10_run-01_bold | X                     |
| 5008        | Phonological | sub-5008_ses-5_task-Phon_acq-D1S12_run-02_bold | X                     |
| 5008        | Semantic     | sub-5008_ses-5_task-Sem_acq-D2S5_run-01_bold   | X                     |
| 5008        | Semantic     | sub-5008_ses-5_task-Sem_acq-D2S3_run-02_bold   | X                     |
| 5010        | Phonological | sub-5010_ses-5_task-Phon_acq-D1S12_run-01_bold | X                     |
| 5010        | Phonological | sub-5010_ses-5_task-Phon_acq-D1S14_run-02_bold | X                     |
| 5010        | Semantic     | sub-5010_ses-5_task-Sem_acq-D2S7_run-01_bold   | X                     |
| 5010        | Semantic     | sub-5010_ses-5_task-Sem_acq-D2S9_run-02_bold   | X                     |
| 5015        | Phonological | sub-5015_ses-5_task-Phon_acq-D1S7_run-01_bold  | X                     |
| 5015        | Phonological | sub-5015_ses-5_task-Phon_acq-D1S15_run-02_bold | X                     |
| 5015        | Semantic     | sub-5015_ses-5_task-Sem_acq-D2S5_run-01_bold   | X                     |
| 5015        | Semantic     | sub-5015_ses-5_task-Sem_acq-D2S11_run-02_bold  | X                     |
| 5023        | Phonological | sub-5023_ses-5_task-Phon_acq-D3S3_run-01_bold  | X                     |
| 5023        | Phonological | sub-5023_ses-5_task-Phon_acq-D2S5_run-02_bold  | X                     |
| 5023        | Semantic     | sub-5023_ses-5_task-Sem_acq-D2S14_run-01_bold  | X                     |
| 5023        | Semantic     | sub-5023_ses-5_task-Sem_acq-D2S12_run-02_bold  | X                     |
| 5024        | Phonological | sub-5024_ses-5_task-Phon_acq-D2S7_run-01_bold  | X                     |
| 5024        | Phonological | sub-5024_ses-5_task-Phon_acq-D2S5_run-02_bold  | X                     |
| 5024        | Semantic     | sub-5024_ses-5_task-Sem_acq-D2S19_run-01_bold  | X                     |
| 5024        | Semantic     | sub-5024_ses-5_task-Sem_acq-D2S17_run-02_bold  | X                     |
| 5029        | Phonological | sub-5029_ses-5_task-Phon_acq-D1S12_run-01_bold | X                     |
| 5029        | Phonological | sub-5029_ses-5_task-Phon_acq-D1S14_run-02_bold | X                     |
| 5029        | Semantic     | sub-5029_ses-5_task-Sem_acq-D2S12_run-01_bold  | X                     |
| 5029        | Semantic     | sub-5029_ses-5_task-Sem_acq-D2S14_run-02_bold  | X                     |
| 5034        | Phonological | sub-5034_ses-5_task-Phon_acq-D1S7_run-01_bold  | X                     |
| 5034        | Phonological | sub-5034_ses-5_task-Phon_acq-D1S9_run-02_bold  | X                     |
| 5034        | Semantic     | sub-5034_ses-5_task-Sem_acq-D2S7_run-01_bold   | X                     |
| 5034        | Semantic     | sub-5034_ses-5_task-Sem_acq-D3S15_run-02_bold  | X                     |
| 5054        | Phonological | sub-5054_ses-5_task-Phon_acq-D1S4_run-01_bold  | X                     |
| 5054        | Phonological | sub-5054_ses-5_task-Phon_acq-D1S6_run-02_bold  | X                     |
| 5054        | Semantic     | sub-5054_ses-5_task-Sem_acq-D2S7_run-01_bold   | X                     |
| 5054        | Semantic     | sub-5054_ses-5_task-Sem_acq-D2S5_run-02_bold   | X                     |
| 5055        | Phonological | sub-5055_ses-5_task-Phon_acq-D1S8_run-01_bold  | X                     |
| 5055        | Phonological | sub-5055_ses-5_task-Phon_acq-D1S10_run-02_bold | X                     |
| 5055        | Semantic     | sub-5055_ses-5_task-Sem_acq-D2S9_run-01_bold   | X                     |

|      |              |                                                |   |
|------|--------------|------------------------------------------------|---|
| 5055 | Semantic     | sub-5055_ses-5_task-Sem_acq-D2S7_run-02_bold   | X |
| 5061 | Phonological | sub-5061_ses-5_task-Phon_acq-D1S4_run-01_bold  | X |
| 5061 | Phonological | sub-5061_ses-5_task-Phon_acq-D1S7_run-02_bold  | X |
| 5061 | Semantic     | sub-5061_ses-5_task-Sem_acq-D3S3_run-01_bold   | X |
| 5061 | Semantic     | sub-5061_ses-5_task-Sem_acq-D3S4_run-02_bold   | X |
| 5070 | Phonological | sub-5070_ses-5_task-Phon_acq-D1S7_run-01_bold  | X |
| 5070 | Phonological | sub-5070_ses-5_task-Phon_acq-D1S5_run-02_bold  | X |
| 5070 | Semantic     | sub-5070_ses-5_task-Sem_acq-D2S9_run-01_bold   | X |
| 5070 | Semantic     | sub-5070_ses-5_task-Sem_acq-D2S7_run-02_bold   | X |
| 5071 | Phonological | sub-5071_ses-5_task-Phon_acq-D1S20_run-01_bold | X |
| 5071 | Phonological | sub-5071_ses-5_task-Phon_acq-D1S10_run-02_bold | X |
| 5071 | Semantic     | sub-5071_ses-5_task-Sem_acq-D2S5_run-01_bold   | X |
| 5071 | Semantic     | sub-5071_ses-5_task-Sem_acq-D2S3_run-02_bold   | X |
| 5091 | Phonological | sub-5091_ses-5_task-Phon_acq-D4S20_run-01_bold | X |
| 5091 | Phonological | sub-5091_ses-5_task-Phon_acq-D4S22_run-02_bold | X |
| 5091 | Semantic     | sub-5091_ses-5_task-Sem_acq-D2S5_run-01_bold   | X |
| 5091 | Semantic     | sub-5091_ses-5_task-Sem_acq-D2S3_run-02_bold   | X |
| 5118 | Phonological | sub-5118_ses-5_task-Phon_acq-D1S6_run-01_bold  | X |
| 5118 | Phonological | sub-5118_ses-5_task-Phon_acq-D1S4_run-02_bold  | X |
| 5118 | Semantic     | sub-5118_ses-5_task-Sem_acq-D2S3_run-01_bold   | X |
| 5118 | Semantic     | sub-5118_ses-5_task-Sem_acq-D2S5_run-02_bold   | X |
| 5126 | Phonological | sub-5126_ses-5_task-Phon_acq-D2S20_run-01_bold | X |
| 5126 | Phonological | sub-5126_ses-5_task-Phon_acq-D2S18_run-02_bold | X |
| 5126 | Semantic     | sub-5126_ses-5_task-Sem_acq-D1S8_run-01_bold   | X |
| 5126 | Semantic     | sub-5126_ses-5_task-Sem_acq-D1S6_run-02_bold   | X |
| 5140 | Phonological | sub-5140_ses-5_task-Phon_acq-D2S3_run-01_bold  | X |
| 5140 | Phonological | sub-5140_ses-5_task-Phon_acq-D1S12_run-02_bold | X |
| 5140 | Semantic     | sub-5140_ses-5_task-Sem_acq-D2S12_run-01_bold  | X |
| 5140 | Semantic     | sub-5140_ses-5_task-Sem_acq-D2S14_run-02_bold  | X |
| 5159 | Phonological | sub-5159_ses-5_task-Phon_acq-D1S33_run-01_bold | X |
| 5159 | Phonological | sub-5159_ses-5_task-Phon_acq-D1S23_run-02_bold | X |
| 5159 | Semantic     | sub-5159_ses-5_task-Sem_acq-D2S11_run-01_bold  | X |
| 5159 | Semantic     | sub-5159_ses-5_task-Sem_acq-D2S9_run-02_bold   | X |
| 5160 | Phonological | sub-5160_ses-5_task-Phon_acq-D1S9_run-01_bold  | X |
| 5160 | Phonological | sub-5160_ses-5_task-Phon_acq-D1S7_run-02_bold  | X |
| 5160 | Semantic     | sub-5160_ses-5_task-Sem_acq-D2S12_run-01_bold  | X |
| 5160 | Semantic     | sub-5160_ses-5_task-Sem_acq-D2S10_run-02_bold  | X |
| 5199 | Phonological | sub-5199_ses-5_task-Phon_acq-D1S3_run-01_bold  | X |
| 5199 | Phonological | sub-5199_ses-5_task-Phon_acq-D1S5_run-02_bold  | X |
| 5199 | Semantic     | sub-5199_ses-5_task-Sem_acq-D2S10_run-01_bold  | X |
| 5199 | Semantic     | sub-5199_ses-5_task-Sem_acq-D2S8_run-02_bold   | X |
| 5215 | Phonological | sub-5215_ses-5_task-Phon_acq-D1S11_run-01_bold | X |
| 5215 | Phonological | sub-5215_ses-5_task-Phon_acq-D1S9_run-02_bold  | X |

|      |              |                                                |   |
|------|--------------|------------------------------------------------|---|
| 5215 | Semantic     | sub-5215_ses-5_task-Sem_acq-D2S2_run-01_bold   | X |
| 5215 | Semantic     | sub-5215_ses-5_task-Sem_acq-D2S4_run-02_bold   | X |
| 5242 | Phonological | sub-5242_ses-5_task-Phon_acq-D1S13_run-01_bold | X |
| 5242 | Phonological | sub-5242_ses-5_task-Phon_acq-D1S3_run-02_bold  | X |
| 5242 | Semantic     | sub-5242_ses-5_task-Sem_acq-D2S6_run-01_bold   | X |
| 5242 | Semantic     | sub-5242_ses-5_task-Sem_acq-D2S8_run-02_bold   | X |
| 5244 | Phonological | sub-5244_ses-5_task-Phon_acq-D1S9_run-01_bold  | X |
| 5244 | Phonological | sub-5244_ses-5_task-Phon_acq-D1S11_run-02_bold | X |
| 5244 | Semantic     | sub-5244_ses-5_task-Sem_acq-D2S6_run-01_bold   | X |
| 5244 | Semantic     | sub-5244_ses-5_task-Sem_acq-D2S8_run-02_bold   | X |
| 5259 | Phonological | sub-5259_ses-5_task-Phon_acq-D1S7_run-01_bold  | X |
| 5259 | Phonological | sub-5259_ses-5_task-Phon_acq-D1S9_run-02_bold  | X |
| 5259 | Semantic     | sub-5259_ses-5_task-Sem_acq-D2S5_run-01_bold   | X |
| 5259 | Semantic     | sub-5259_ses-5_task-Sem_acq-D2S12_run-02_bold  | X |
| 5267 | Phonological | sub-5267_ses-5_task-Phon_acq-D2S20_run-01_bold | X |
| 5267 | Phonological | sub-5267_ses-5_task-Phon_acq-D2S15_run-02_bold | X |
| 5267 | Semantic     | sub-5267_ses-5_task-Sem_acq-D3S14_run-01_bold  | X |
| 5267 | Semantic     | sub-5267_ses-5_task-Sem_acq-D3S12_run-02_bold  | X |
| 5270 | Phonological | sub-5270_ses-5_task-Phon_acq-D1S5_run-01_bold  | X |
| 5270 | Phonological | sub-5270_ses-5_task-Phon_acq-D1S3_run-02_bold  | X |
| 5270 | Semantic     | sub-5270_ses-5_task-Sem_acq-D2S8_run-01_bold   | X |
| 5270 | Semantic     | sub-5270_ses-5_task-Sem_acq-D2S6_run-02_bold   | X |
| 5286 | Phonological | sub-5286_ses-5_task-Phon_acq-D1S3_run-01_bold  | X |
| 5286 | Phonological | sub-5286_ses-5_task-Phon_acq-D1S5_run-02_bold  | X |
| 5286 | Semantic     | sub-5286_ses-5_task-Sem_acq-D2S2_run-01_bold   | X |
| 5286 | Semantic     | sub-5286_ses-5_task-Sem_acq-D2S4_run-02_bold   | X |
| 5304 | Phonological | sub-5304_ses-5_task-Phon_acq-D1S8_run-01_bold  | X |
| 5304 | Phonological | sub-5304_ses-5_task-Phon_acq-D1S3_run-02_bold  | X |
| 5304 | Semantic     | sub-5304_ses-5_task-Sem_acq-D2S5_run-01_bold   | X |
| 5304 | Semantic     | sub-5304_ses-5_task-Sem_acq-D2S7_run-02_bold   | X |
| 5336 | Phonological | sub-5336_ses-5_task-Phon_acq-D2S4_run-01_bold  | X |
| 5336 | Phonological | sub-5336_ses-5_task-Phon_acq-D2S2_run-02_bold  | X |
| 5336 | Semantic     | sub-5336_ses-5_task-Sem_acq-D1S3_run-01_bold   | X |
| 5336 | Semantic     | sub-5336_ses-5_task-Sem_acq-D1S5_run-02_bold   | X |
| 5338 | Phonological | sub-5338_ses-5_task-Phon_acq-D2S5_run-01_bold  | X |
| 5338 | Phonological | sub-5338_ses-5_task-Phon_acq-D2S3_run-02_bold  | X |
| 5338 | Semantic     | sub-5338_ses-5_task-Sem_acq-D1S7_run-01_bold   | X |
| 5338 | Semantic     | sub-5338_ses-5_task-Sem_acq-D1S9_run-02_bold   | X |
| 5352 | Phonological | sub-5352_ses-5_task-Phon_acq-D2S6_run-01_bold  | X |
| 5352 | Phonological | sub-5352_ses-5_task-Phon_acq-D2S8_run-02_bold  | X |
| 5352 | Semantic     | sub-5352_ses-5_task-Sem_acq-D1S7_run-01_bold   | X |
| 5352 | Semantic     | sub-5352_ses-5_task-Sem_acq-D1S11_run-02_bold  | X |
| 5009 | Phonological | sub-5009_ses-5_task-Phon_acq-D3S5_run-01_bold  |   |
| 5009 | Phonological | sub-5009_ses-5_task-Phon_acq-D3S7_run-02_bold  |   |

|      |              |                                                |
|------|--------------|------------------------------------------------|
| 5009 | Semantic     | sub-5009_ses-5_task-Sem_acq-D3S9_run-01_bold   |
| 5009 | Semantic     | sub-5009_ses-5_task-Sem_acq-D3S11_run-02_bold  |
| 5045 | Phonological | sub-5045_ses-5_task-Phon_acq-D1S10_run-01_bold |
| 5045 | Phonological | sub-5045_ses-5_task-Phon_acq-D1S8_run-02_bold  |
| 5045 | Semantic     | sub-5045_ses-5_task-Sem_acq-D2S7_run-01_bold   |
| 5045 | Semantic     | sub-5045_ses-5_task-Sem_acq-D2S5_run-02_bold   |
| 5049 | Phonological | sub-5049_ses-5_task-Phon_acq-D1S4_run-01_bold  |
| 5049 | Phonological | sub-5049_ses-5_task-Phon_acq-D1S8_run-02_bold  |
| 5049 | Semantic     | sub-5049_ses-5_task-Sem_acq-D2S9_run-01_bold   |
| 5049 | Semantic     | sub-5049_ses-5_task-Sem_acq-D2S11_run-02_bold  |
| 5075 | Phonological | sub-5075_ses-5_task-Phon_acq-D1S6_run-01_bold  |
| 5075 | Phonological | sub-5075_ses-5_task-Phon_acq-D1S8_run-02_bold  |
| 5075 | Semantic     | sub-5075_ses-5_task-Sem_acq-D2S5_run-01_bold   |
| 5075 | Semantic     | sub-5075_ses-5_task-Sem_acq-D2S3_run-02_bold   |
| 5077 | Phonological | sub-5077_ses-5_task-Phon_acq-D1S8_run-01_bold  |
| 5077 | Phonological | sub-5077_ses-5_task-Phon_acq-D1S10_run-02_bold |
| 5077 | Semantic     | sub-5077_ses-5_task-Sem_acq-D2S7_run-01_bold   |
| 5077 | Semantic     | sub-5077_ses-5_task-Sem_acq-D2S9_run-02_bold   |
| 5099 | Phonological | sub-5099_ses-5_task-Phon_acq-D3S7_run-01_bold  |
| 5099 | Phonological | sub-5099_ses-5_task-Phon_acq-D3S9_run-02_bold  |
| 5099 | Semantic     | sub-5099_ses-5_task-Sem_acq-D2S12_run-01_bold  |
| 5099 | Semantic     | sub-5099_ses-5_task-Sem_acq-D2S8_run-02_bold   |
| 5102 | Phonological | sub-5102_ses-5_task-Phon_acq-D1S6_run-01_bold  |
| 5102 | Phonological | sub-5102_ses-5_task-Phon_acq-D1S4_run-02_bold  |
| 5102 | Semantic     | sub-5102_ses-5_task-Sem_acq-D2S7_run-01_bold   |
| 5102 | Semantic     | sub-5102_ses-5_task-Sem_acq-D2S5_run-02_bold   |
| 5109 | Phonological | sub-5109_ses-5_task-Phon_acq-D1S10_run-01_bold |
| 5109 | Phonological | sub-5109_ses-5_task-Phon_acq-D1S14_run-02_bold |
| 5109 | Semantic     | sub-5109_ses-5_task-Sem_acq-D2S3_run-01_bold   |
| 5109 | Semantic     | sub-5109_ses-5_task-Sem_acq-D2S5_run-02_bold   |
| 5161 | Phonological | sub-5161_ses-5_task-Phon_acq-D1S8_run-01_bold  |
| 5161 | Phonological | sub-5161_ses-5_task-Phon_acq-D1S3_run-02_bold  |
| 5161 | Semantic     | sub-5161_ses-5_task-Sem_acq-D2S2_run-01_bold   |
| 5161 | Semantic     | sub-5161_ses-5_task-Sem_acq-D2S4_run-02_bold   |
| 5185 | Phonological | sub-5185_ses-5_task-Phon_acq-D1S3_run-01_bold  |
| 5185 | Phonological | sub-5185_ses-5_task-Phon_acq-D1S5_run-02_bold  |
| 5185 | Semantic     | sub-5185_ses-5_task-Sem_acq-D2S6_run-01_bold   |
| 5185 | Semantic     | sub-5185_ses-5_task-Sem_acq-D2S8_run-02_bold   |

## 2 Supplementary Results – Exploring the Role of Contextual Factors

It is possible that other contextual factors related to participants educational, social, and home environments also influence language and literacy development. To more broadly explore the potential influence of these factors, we investigated whether there was a significant relation between

semantic, phonological, or reading skill and a series of child-level factors (i.e., child's age of first spoken word, how long per day child is read to, how long per day child reads on own, how long per day child watches television, and how long per day child uses a computer or tablet) and guardian-level factors (i.e., highest grade level completed by first guardian, highest grade level completed by second guardian, and annual family income). These additional variables were taken from surveys collected as part of the larger study the current sample was selected from. For more information on the procedures for this larger study see Wang et al., submitted and for access to the survey data see <https://openneuro.org/datasets/ds003604/versions/1.0.2>). For the majority of the additional contextual factors examined, no significant relation was found with any of the language or literacy variables ( $p$ s = .100 - .963). However, three variables did show significant, or marginally significant, relations. That is, phonological processing skill, as measured by performance on the Elision subtest, was found to vary based on how long per day a child reads ( $p = .004$ ) and the highest grade level completed by a child's first guardian ( $p = .024$ ), phonological neural specialization was found to vary based on the highest grade level completed by a child's first guardian ( $p = .093$ ), semantic processing skill, as measured by performance on the Word Classes subtest, was found to vary based on how long per day a child watches television ( $p = .050$ ), and reading growth was found to vary based on how long per day a child reads ( $p = .002$ ). When the exploratory models were re-estimated to include these additional contextual variables, the pattern of results observed was consistent with the reported findings. The best fitting model, showing the lowest BIC value and the highest BF, was found to be the Brain-and-Behavior model ( $BF = 23.38$ ;  $F(8, 31) = 4.23$ ,  $p = .002$ ,  $R^2 = .52$ ). Among the language processing variables, only the phonological predictors were significantly related to variability in reading growth ( $\beta_{\text{Elision}} = -.39$ ,  $p = .016$ ;  $\beta_{\text{PhonSpec}} = .34$ ,  $p = .019$ ).

### **3 Supplementary Results – Model Selection using Akaike Information Criterion Values**

In the present study, BIC values were used for model selection however as an additional test of the robustness of the results the exploratory models were reevaluated via the Akaike Information Criterion (AIC), another penalized-likelihood criteria. The pattern of results based on the AIC values was in line with the reported results, that is, the highest AIC value (e.g., lowest model fit) was found for the Brain model (49.51), followed by the Behavior model (40.16) and the Brain-and-Behavior model (37.66).
